# Supplementary material for: Uncovering the Neural Correlates of Anhedonia Subtypes in Major Depressive Disorder: Implications for Intervention Strategies
Source: MDPI journal article supplement (doi:10.3390/biomedicines11123138), 2023-11-24
Supplement: s1 [file s1]

# **Distinct anhedonia components and related subgroups in a sample of patients with major depressive disorder: A preliminary study**

## **Supplementary Methods**

### **Participants**

This study was approved by the Medical Research Ethics Committee of the Second Xiangya Hospital of Central South University, China. Sixty-four patients with first-episode drug-naïve MDD (31 melancholic MDD and 33 non-melancholic MDD) were recruited from outpatients from May 4, 2014 to December 30, 2016, and 32 healthy controls were recruited from the community using printed advertisements. All participants were right-handed Han Chinese aged 18-45 years and with more than 9 years of education, and gave their written informed consents after fully understanding the study procedures. All patients were independently interviewed and diagnosed by two psychiatrists according to DSM-IV. The patients should be in their first major depressive episode with a total score of more than 17 in the 17-item Hamilton Rating Scale for Depression (HAM-D), and an illness duration of less than 12 months. The exclusion criteria were as follows: (1) concurrent axis I disorders, (2) history of any neurological disorders or substance abuse, and (3) exposure to psychotropic medications within at least 2 months. Healthy controls should have no first-degree family history of mental illness.

### **Image Acquisition and preprocessing**

The resting-state functional images were acquired with echo planar imaging (EPI) sequence by the following parameters: repetition time/echo time (TR/TE) 2500/25 ms, 39 slices,  $64 \times 64$  matrix,  $90^\circ$  flip angle, 24 cm field of view, 3.5 mm slice thickness, no gap, and 200 volumes lasting for 500s. All these imaging data were preprocessed using DPARSF (<http://rfmri.org/DPARSF>) in MATLAB<sup>1</sup>. To reduce effects of scanner signal stabilization, the first 10 images were discarded. Scans with maximum displacement of x, y, or z axis exceeding 2 mm or more than  $2^\circ$  of maximum angular rotation would be discarded. Functional and structural images were co-registered. Then structural images were normalized and segmented into gray, white and cerebrospinal fluid (CSF) partitions using the DARTEL technique. Several spurious covariates were removed from the realigned data, such as the signal from the ventricular seed-based ROI and the white matter-centered area, as well as the Friston 24-parameter model. The global signal was preserved<sup>2</sup>. After that, framewise displacement (FD) was calculated for all resting state volumes. All volumes with a FD greater than 0.5 mm were regressed out as nuisance covariates. Any scan with 50% of volumes removed was discarded. Then, functional time series were band pass filtered to select frequencies between 0.01-0.08 Hz and normalized by DARTEL into the Montreal Neurological Institute (MNI) template and then spatially smoothed at 6 mm full-width at half maximum (FWHM).

### **Meta-analyses for task-based fMRI studies**

#### **Study selection**

A Embase, Pubmed and Web of Science database search was performed on all human studies between January 1, 2000 and May 1, 2022. The following terms and their derivatives were searched in [Title/Abstract]: *consummatory pleasure/consummatory anhedonia/reward outcome/reward gains/reward anticipation/anticipatory pleasure/anticipatory anhedonia/monetary incentive delay task/gambling task* and *major depressive*

*disorder/depression/depressive disorder*. To enhance search sensitivity, we also searched the reference lists manually as a supplement.

All available fMRI studies which investigated reward processing dysfunction in depressed individuals compared with healthy controls in all age groups were included. Specifically, studies with patients with MDD diagnosed by standardized diagnostic criteria were prioritized to be included in the meta-analysis. Studies with subjects with subthreshold depression and those who have first-degree relatives with a history of MDD were also included. We selected only studies that used instrumental reward tasks in which rewards were obtained by complete an action correctly rather presented passively (e.g., facial emotions or images)<sup>3</sup>.

We excluded studies with depressed patients with other psychiatric disorders such as bipolar disorder and schizophrenia, or comorbid substance abuse disorders. Studies focused on reward-related decision-making or effort expenditure were also ruled out.

### **Data extraction and analysis**

Data from the included studies such as demographic and methodological information, coordinates of significant brain areas, and statistics (e.g., t values or z values) were extracted. All coordinates were summarized in Montreal Neurological Institution (MNI) space. Studies reported outcomes in Talairach space were converted to MNI coordinates.

For studies which reported comparisons between depressed patients and healthy controls, SDM-PSI software version 6.22 (<https://www.sdmproject.com/>) was used. It combines several positive features from previous approaches, such as activation likelihood estimation and Multilevel Kernel Density Analysis, and introduced several improvements. Importantly, it provides a novel approach based on multiple imputation algorithms, which is able to reduce bias by including studies with NSUEs. Instead of simply excluding these studies (which would inflate result) or assuming them to have a null effect size (which could be too conservative), this method calculates maximum likelihood estimations of these NSUEs, creates realistic imputations, conducts a standard meta-analysis using restricted maximum-likelihood random-effect models for each set of imputations, and finally pools these meta-analyses. As recommend by SDM-PSI<sup>4</sup>, the threshold was set at cluster-level  $p < 0.05$  (threshold-free cluster enhancement-based family-wise error [FWE] correction) or  $p < 0.001$  (uncorrected).

Given possible between-study heterogeneities introduced by age, sex, diagnoses and analysis method, our primary analyses were performed only in whole-brain studies with adult patients with acute MDD. Age, sex, education years and depressive severity were added as covariates in the comparative meta-analysis using the SDM-PSI. Specifically, the original scores of depressive severity in each study were standardized due to different rating scales used. We also included whole-brain studies with teenagers and patients with remitted MDD, subthreshold depression or high-risk of depression in the follow-up analyses to test whether outcomes would be significantly affected by these factors.

### **Supplementary Results**

#### **MDD patients revealed reduced activity in dorsal striatum during reward feedback**

Overall, forty-three task-based fMRI studies examining reward prediction and experience met predefined the inclusion criteria, and 35 of them (590 patients with MDD, 147 subjects with remitted MDD or subthreshold depression or high-risk of depression, and 773 healthy controls)

were finally included in the meta-analyses (Figure S2, Table S3 and S4).

As shown in Figure 3 and Table S4, compared with healthy controls, patients with MDD exhibited increased activation in the supplementary motor area and decreased activation in the cerebellum lobule VI/fusiform gyrus ( $p < 0.01$ , uncorrected) during reward anticipation. During reward feedback, less blood-oxygen-level-dependent response in the putamen, caudate, and parahippocampal gyrus was observed in patients with MDD ( $p < 0.001$ , uncorrected). No results were reported when adopted a more conservative threshold FWE-corrected  $p < 0.05$ . We also performed a meta-analysis for all whole-brain studies regardless of age and diagnoses, results were similar except that no areas displayed increased activation in patients with MDD relative to healthy controls ( $p < 0.01$ , uncorrected).

### **Supplementary Discussion**

The association of the dopaminergic system with the reward processing has been well-established in numerous preclinical and clinical studies. More recent research has expanded our understanding of reward mediation on a transmitter level, revealing interactions with other neurotransmitter systems like serotonergic, opioid, and glutamatergic systems<sup>5</sup>. This broader perspective suggests that distinct neurotransmitter systems may mediate various aspects of reward, with anticipatory pleasure being predominantly associated with dopaminergic mechanisms, while consummatory pleasure primarily linking to the opioid and serotonergic systems<sup>5</sup>.

As for dopaminergic system, previous studies have demonstrated that rewarding experiences result in the release of dopamine in the striatum, particularly within the NAc, as evidenced by a reduction in the binding potential of dopamine receptor subtypes 2<sup>6</sup>. With regard to serotonergic system, studies have revealed that regions associated with reward processing receive substantial innervation from serotonergic neurons originating in the raphe nuclei. It has been reported that the serotonergic neurotransmitter system exerts a modulatory influence on the reward network through various receptors, including the 5-HT<sub>1A</sub>, 5-HT<sub>2A</sub> receptors, and the serotonin transporter (5-HTT)<sup>7</sup>. Evidence has indicated a significant reduction of 5-HTT in the midbrain and striatum in individuals with MDD<sup>8</sup>. It is important to note that while 5-HT signaling contributes to reward processing related to reward learning, anticipation, and outcome, the effects of SSRIs treatment on anhedonia are still unclear. Some studies reported reduced motivation and effort in depressed patients and enhanced effort expenditure in healthy subjects after an 8-week course of escitalopram treatment<sup>9, 10</sup>. This may be the reason why some patients did not benefit from Selective serotonin reuptake inhibitors (SSRIs) treatment. Similarly, inhibition of glutamate release also led to partial deficits in reward experiments<sup>11</sup>. It is suggested that the interplay between glutamate and striatal activity plays a pivotal role in modulating synaptic plasticity and neural excitability<sup>12</sup>. In particular, the influence of glutamatergic input from the frontal cortex has been underscored, with research revealing the impact of glutamatergic frontal neurons on dopaminergic neurotransmission in the ventral striatum through GABAergic neurons<sup>13</sup>. Moreover, there have been documented associations between glutamate levels and fronto-limbic functional connectivity<sup>14</sup>. As mentioned before, the opioid system in the NAc shell and the ventral pallidum plays a role in mediating consummatory pleasure. Opioid receptor antagonists have been suggested as a potential treatment for anhedonia based on robust preclinical data indicating the involvement of these receptors in modulating reward processing and stress regulation. Drawing from the available evidence, our hypothesis points that neurotransmitter systems, including

serotonergic, opioid, glutamatergic, and dopaminergic systems, exhibit varying degree of disruption within anhedonia subgroups of MDD. Patients exhibiting the most profound impairments in experiencing both anticipatory and consummatory pleasure are expected to demonstrate more severe dysfunction in neurotransmitter systems.

#### References:

- (1) Chao-Gan, Y.; Yu-Feng, Z. DPARSF: A MATLAB Toolbox for "Pipeline" Data Analysis of Resting-State fMRI. *Front Syst Neurosci* **2010**, *4*, 13. DOI: 10.3389/fnsys.2010.00013.
- (2) Hahamy, A.; Calhoun, V.; Pearlson, G.; Harel, M.; Stern, N.; Attar, F.; Malach, R.; Salomon, R. Save the global: global signal connectivity as a tool for studying clinical populations with functional magnetic resonance imaging. *Brain Connect* **2014**, *4* (6), 395-403. DOI: 10.1089/brain.2014.0244.
- (3) Keren, H.; O'Callaghan, G.; Vidal-Ribas, P.; Buzzell, G. A.; Brotman, M. A.; Leibenluft, E.; Pan, P. M.; Meffert, L.; Kaiser, A.; Wolke, S.; et al. Reward Processing in Depression: A Conceptual and Meta-Analytic Review Across fMRI and EEG Studies. *Am J Psychiatry* **2018**, *175* (11), 1111-1120. DOI: 10.1176/appi.ajp.2018.17101124.
- (4) Albajes-Eizagirre, A.; Solanes, A.; Radua, J. Meta-analysis of non-statistically significant unreported effects. *Stat Methods Med Res* **2019**, *28* (12), 3741-3754. DOI: 10.1177/0962280218811349.
- (5) Hoflich, A.; Michenthaler, P.; Kasper, S.; Lanzenberger, R. Circuit Mechanisms of Reward, Anhedonia, and Depression. *Int J Neuropsychopharmacol* **2019**, *22* (2), 105-118. DOI: 10.1093/ijnp/pyy081 From NLM Medline.
- (6) Jonasson, L. S.; Axelsson, J.; Riklund, K.; Braver, T. S.; Ogren, M.; Backman, L.; Nyberg, L. Dopamine release in nucleus accumbens during rewarded task switching measured by [(1)(1)C]raclopride. *Neuroimage* **2014**, *99*, 357-364. DOI: 10.1016/j.neuroimage.2014.05.047 From NLM Medline.
- (7) Spies, M.; Knudsen, G. M.; Lanzenberger, R.; Kasper, S. The serotonin transporter in psychiatric disorders: insights from PET imaging. *Lancet Psychiatry* **2015**, *2* (8), 743-755. DOI: 10.1016/S2215-0366(15)00232-1 From NLM Medline.
- (8) Gryglewski, G.; Lanzenberger, R.; Kranz, G. S.; Cumming, P. Meta-analysis of molecular imaging of serotonin transporters in major depression. *J Cereb Blood Flow Metab* **2014**, *34* (7), 1096-1103. DOI: 10.1038/jcbfm.2014.82 From NLM Medline.
- (9) Pringle, A.; McCabe, C.; Cowen, P. J.; Harmer, C. J. Antidepressant treatment and emotional processing: can we dissociate the roles of serotonin and noradrenaline? *J Psychopharmacol* **2013**, *27* (8), 719-731. DOI: 10.1177/0269881112474523 From NLM Medline.
- (10) Meyniel, F.; Goodwin, G. M.; Deakin, J. W.; Klinge, C.; MacFadyen, C.; Milligan, H.; Mullings, E.; Pessiglione, M.; Gaillard, R. A specific role for serotonin in overcoming effort cost. *Elife* **2016**, *5*. DOI: 10.7554/eLife.17282 From NLM Medline.
- (11) Liu, Z.; Zhou, J.; Li, Y.; Hu, F.; Lu, Y.; Ma, M.; Feng, Q.; Zhang, J. E.; Wang, D.; Zeng, J.; et al. Dorsal raphe neurons signal reward through 5-HT and glutamate. *Neuron* **2014**, *81* (6), 1360-1374. DOI: 10.1016/j.neuron.2014.02.010 From NLM Medline.
- (12) Gleich, T.; Lorenz, R. C.; Pohland, L.; Raufelder, D.; Deserno, L.; Beck, A.; Heinz, A.; Kuhn, S.; Gallinat, J. Frontal glutamate and reward processing in adolescence and adulthood. *Brain Struct Funct* **2015**, *220* (6), 3087-3099. DOI: 10.1007/s00429-014-0844-3 From NLM Medline.
- (13) Carlsson, A.; Waters, N.; Carlsson, M. L. Neurotransmitter interactions in schizophrenia--therapeutic implications. *Biol Psychiatry* **1999**, *46* (10), 1388-1395. DOI: 10.1016/S0006-3223(99)00117-

1 From NLM Medline.

(14) Duncan, N. W.; Wiebking, C.; Tiret, B.; Marjanska, M.; Hayes, D. J.; Lyttleton, O.; Doyon, J.; Northoff, G. Glutamate concentration in the medial prefrontal cortex predicts resting-state cortical-subcortical functional connectivity in humans. *PLoS One* **2013**, *8* (4), e60312. DOI: 10.1371/journal.pone.0060312 From NLM Medline.

(15) Admon, R.; Nickerson, L. D.; Dillon, D. G.; Holmes, A. J.; Bogdan, R.; Kumar, P.; Dougherty, D. D.; Iosifescu, D. V.; Mischoulon, D.; Fava, M.; et al. Dissociable cortico-striatal connectivity abnormalities in major depression in response to monetary gains and penalties. *Psychol Med* **2015**, *45* (1), 121-131. DOI: 10.1017/s0033291714001123 From NLM.

(16) Admon, R.; Kaiser, R. H.; Dillon, D. G.; Beltzer, M.; Goer, F.; Olson, D. P.; Vitaliano, G.; Pizzagalli, D. A. Dopaminergic Enhancement of Striatal Response to Reward in Major Depression. *Am J Psychiatry* **2017**, *174* (4), 378-386. DOI: 10.1176/appi.ajp.2016.16010111 From NLM.

(17) Arrondo, G.; Segarra, N.; Metastasio, A.; Ziauddeen, H.; Spencer, J.; Reinders, N. R.; Dudas, R. B.; Robbins, T. W.; Fletcher, P. C.; Murray, G. K. Reduction in ventral striatal activity when anticipating a reward in depression and schizophrenia: a replicated cross-diagnostic finding. *Front Psychol* **2015**, *6*, 1280. DOI: 10.3389/fpsyg.2015.01280 From NLM.

(18) Chandrasekhar Pammi, V. S.; Pillai Geethabhavan Rajesh, P.; Kesavadas, C.; Rappai Mary, P.; Seema, S.; Radhakrishnan, A.; Sitaram, R. Neural loss aversion differences between depression patients and healthy individuals: A functional MRI investigation. *Neuroradiol J* **2015**, *28* (2), 97-105. DOI: 10.1177/1971400915576670.

(19) DelDonno, S. R.; Mickey, B. J.; Pruitt, P. J.; Stange, J. P.; Hsu, D. T.; Weldon, A. L.; Zubieta, J. K.; Langenecker, S. A. Influence of childhood adversity, approach motivation traits, and depression on individual differences in brain activation during reward anticipation. *Biol Psychol* **2019**, *146*, 107709. DOI: 10.1016/j.biopsycho.2019.05.009.

(20) Dillon, D. G.; Dobbins, I. G.; Pizzagalli, D. A. Weak reward source memory in depression reflects blunted activation of VTA/SN and parahippocampus. *Soc Cogn Affect Neurosci* **2014**, *9* (10), 1576-1583. DOI: 10.1093/scan/nst155.

(21) Dichter, G. S.; Kozink, R. V.; McClernon, F. J.; Smoski, M. J. Remitted major depression is characterized by reward network hyperactivation during reward anticipation and hypoactivation during reward outcomes. *J Affect Disord* **2012**, *136* (3), 1126-1134. DOI: 10.1016/j.jad.2011.09.048.

(22) Forbes, E. E.; Hariri, A. R.; Martin, S. L.; Silk, J. S.; Moyses, D. L.; Fisher, P. M.; Brown, S. M.; Ryan, N. D.; Birmaher, B.; Axelson, D. A.; et al. Altered striatal activation predicting real-world positive affect in adolescent major depressive disorder. *Am J Psychiatry* **2009**, *166* (1), 64-73. DOI: 10.1176/appi.ajp.2008.07081336.

(23) Gaillard, C.; Guillod, M.; Ernst, M.; Federspiel, A.; Schoebi, D.; Recabarren, R. E.; Ouyang, X.; Mueller-Pfeiffer, C.; Horsch, A.; Homan, P.; et al. Striatal reactivity to reward under threat-of-shock and working memory load in adults at increased familial risk for major depression: A preliminary study. *Neuroimage Clin* **2020**, *26*, 102193. DOI: 10.1016/j.nicl.2020.102193.

(24) Gorka, S. M.; Huggins, A. A.; Fitzgerald, D. A.; Nelson, B. D.; Phan, K. L.; Shankman, S. A. Neural response to reward anticipation in those with depression with and without panic disorder. *J Affect Disord* **2014**, *164*, 50-56. DOI: 10.1016/j.jad.2014.04.019.

(25) Gotlib, I. H.; Hamilton, J. P.; Cooney, R. E.; Singh, M. K.; Henry, M. L.; Joormann, J. Neural processing of reward and loss in girls at risk for major depression. *Arch Gen Psychiatry* **2010**, *67* (4), 380-387. DOI: 10.1001/archgenpsychiatry.2010.13.

- (26) Gradin, V. B.; Kumar, P.; Waiter, G.; Ahearn, T.; Stickle, C.; Milders, M.; Reid, I.; Hall, J.; Steele, J. D. Expected value and prediction error abnormalities in depression and schizophrenia. *Brain* **2011**, *134* (Pt 6), 1751-1764. DOI: 10.1093/brain/awr059.
- (27) Hägele, C.; Schlagenhaut, F.; Rapp, M.; Sterzer, P.; Beck, A.; Bermpohl, F.; Stoy, M.; Ströhle, A.; Wittchen, H. U.; Dolan, R. J.; et al. Dimensional psychiatry: reward dysfunction and depressive mood across psychiatric disorders. *Psychopharmacology (Berl)* **2015**, *232* (2), 331-341. DOI: 10.1007/s00213-014-3662-7 From NLM.
- (28) Hall, G. B.; Milne, A. M.; Macqueen, G. M. An fMRI study of reward circuitry in patients with minimal or extensive history of major depression. *Eur Arch Psychiatry Clin Neurosci* **2014**, *264* (3), 187-198. DOI: 10.1007/s00406-013-0437-9.
- (29) He, Z.; Zhang, D.; Muhlert, N.; Elliott, R. Neural substrates for anticipation and consumption of social and monetary incentives in depression. *Soc Cogn Affect Neurosci* **2019**, *14* (8), 815-826. DOI: 10.1093/scan/nsz061.
- (30) Jin, J.; Narayanan, A.; Perlman, G.; Luking, K.; DeLorenzo, C.; Hajcak, G.; Klein, D. N.; Kotov, R.; Mohanty, A. Orbitofrontal cortex activity and connectivity predict future depression symptoms in adolescence. *Biol Psychiatry Cogn Neurosci Neuroimaging* **2017**, *2* (7), 610-618. DOI: 10.1016/j.bpsc.2017.02.002 From NLM.
- (31) Johnston, B. A.; Tolomeo, S.; Gradin, V.; Christmas, D.; Matthews, K.; Steele, J. D. Failure of hippocampal deactivation during loss events in treatment-resistant depression. *Brain* **2015**, *138* (Pt 9), 2766-2776. DOI: 10.1093/brain/awv177.
- (32) Knutson, B.; Bhanji, J. P.; Cooney, R. E.; Atlas, L. Y.; Gotlib, I. H. Neural responses to monetary incentives in major depression. *Biol Psychiatry* **2008**, *63* (7), 686-692. DOI: 10.1016/j.biopsych.2007.07.023 From NLM.
- (33) Kumar, P.; Goer, F.; Murray, L.; Dillon, D. G.; Beltzer, M. L.; Cohen, A. L.; Brooks, N. H.; Pizzagalli, D. A. Impaired reward prediction error encoding and striatal-midbrain connectivity in depression. *Neuropsychopharmacology* **2018**, *43* (7), 1581-1588. DOI: 10.1038/s41386-018-0032-x.
- (34) Liu, W. H.; Valton, V.; Wang, L. Z.; Zhu, Y. H.; Roiser, J. P. Association between habenula dysfunction and motivational symptoms in unmedicated major depressive disorder. *Soc Cogn Affect Neurosci* **2017**, *12* (9), 1520-1533. DOI: 10.1093/scan/nsx074.
- (35) Luking, K. R.; Pagliaccio, D.; Luby, J. L.; Barch, D. M. Depression Risk Predicts Blunted Neural Responses to Gains and Enhanced Responses to Losses in Healthy Children. *J Am Acad Child Adolesc Psychiatry* **2016**, *55* (4), 328-337. DOI: 10.1016/j.jaac.2016.01.007.
- (36) Mori, A.; Okamoto, Y.; Okada, G.; Takagaki, K.; Jinnin, R.; Takamura, M.; Kobayakawa, M.; Yamawaki, S. Behavioral activation can normalize neural hypoactivation in subthreshold depression during a monetary incentive delay task. *J Affect Disord* **2016**, *189*, 254-262. DOI: 10.1016/j.jad.2015.09.036 From NLM.
- (37) Olino, T. M.; McMakin, D. L.; Dahl, R. E.; Ryan, N. D.; Silk, J. S.; Birmaher, B.; Axelson, D. A.; Forbes, E. E. "I won, but I'm not getting my hopes up": depression moderates the relationship of outcomes and reward anticipation. *Psychiatry Res* **2011**, *194* (3), 393-395. DOI: 10.1016/j.psychres.2011.04.009.
- (38) Olino, T. M.; McMakin, D. L.; Morgan, J. K.; Silk, J. S.; Birmaher, B.; Axelson, D. A.; Williamson, D. E.; Dahl, R. E.; Ryan, N. D.; Forbes, E. E. Reduced reward anticipation in youth at high-risk for unipolar depression: a preliminary study. *Developmental cognitive neuroscience* **2014**, *8*, 55-64. DOI: 10.1016/j.dcn.2013.11.005.
- (39) Pizzagalli, D. A.; Holmes, A. J.; Dillon, D. G.; Goetz, E. L.; Birk, J. L.; Bogdan, R.; Dougherty, D. D.;

- Iosifescu, D. V.; Rauch, S. L.; Fava, M. Reduced caudate and nucleus accumbens response to rewards in unmedicated individuals with major depressive disorder. *Am J Psychiatry* **2009**, *166* (6), 702-710. DOI: 10.1176/appi.ajp.2008.08081201.
- (40) Redlich, R.; Dohm, K.; Grotegerd, D.; Opel, N.; Zwieterlood, P.; Heindel, W.; Arolt, V.; Kugel, H.; Dannlowski, U. Reward Processing in Unipolar and Bipolar Depression: A Functional MRI Study. *Neuropsychopharmacology* **2015**, *40* (11), 2623-2631. DOI: 10.1038/npp.2015.110.
- (41) Remijnse, P. L.; Nielen, M. M.; van Balkom, A. J.; Hendriks, G. J.; Hoogendijk, W. J.; Uylings, H. B.; Veltman, D. J. Differential frontal-striatal and paralimbic activity during reversal learning in major depressive disorder and obsessive-compulsive disorder. *Psychol Med* **2009**, *39* (9), 1503-1518. DOI: 10.1017/S0033291708005072.
- (42) Robinson, O. J.; Cools, R.; Carlisi, C. O.; Sahakian, B. J.; Drevets, W. C. Ventral striatum response during reward and punishment reversal learning in unmedicated major depressive disorder. *Am J Psychiatry* **2012**, *169* (2), 152-159. DOI: 10.1176/appi.ajp.2011.11010137.
- (43) Sankar, A.; Yttredahl, A. A.; Fourcade, E. W.; Mickey, B. J.; Love, T. M.; Langenecker, S. A.; Hsu, D. T. Dissociable Neural Responses to Monetary and Social Gain and Loss in Women With Major Depressive Disorder. *Front Behav Neurosci* **2019**, *13*, 149. DOI: 10.3389/fnbeh.2019.00149 From NLM.
- (44) Satterthwaite, T. D.; Kable, J. W.; Vandekar, L.; Katchmar, N.; Bassett, D. S.; Baldassano, C. F.; Ruparel, K.; Elliott, M. A.; Sheline, Y. I.; Gur, R. C.; et al. Common and Dissociable Dysfunction of the Reward System in Bipolar and Unipolar Depression. *Neuropsychopharmacology* **2015**, *40* (9), 2258-2268. DOI: 10.1038/npp.2015.75.
- (45) Schneider, M.; Elbau, I. G.; Nantawisarakul, T.; Pöhlchen, D.; Brückl, T.; Be, C. W. G.; Czisch, M.; Saemann, P. G.; Lee, M. D.; Binder, E. B.; et al. Pupil Dilation during Reward Anticipation Is Correlated to Depressive Symptom Load in Patients with Major Depressive Disorder. *Brain sciences* **2020**, *10* (12). DOI: 10.3390/brainsci10120906 From NLM.
- (46) Segarra, N.; Metastasio, A.; Ziauddeen, H.; Spencer, J.; Reinders, N. R.; Dudas, R. B.; Arrondo, G.; Robbins, T. W.; Clark, L.; Fletcher, P. C.; et al. Abnormal Frontostriatal Activity During Unexpected Reward Receipt in Depression and Schizophrenia: Relationship to Anhedonia. *Neuropsychopharmacology* **2016**, *41* (8), 2001-2010. DOI: 10.1038/npp.2015.370.
- (47) Sharp, C.; Kim, S.; Herman, L.; Pane, H.; Reuter, T.; Strathearn, L. Major depression in mothers predicts reduced ventral striatum activation in adolescent female offspring with and without depression. *J Abnorm Psychol* **2014**, *123* (2), 298-309. DOI: 10.1037/a0036191.
- (48) Smoski, M. J.; Felder, J.; Bizzell, J.; Green, S. R.; Ernst, M.; Lynch, T. R.; Dichter, G. S. fMRI of alterations in reward selection, anticipation, and feedback in major depressive disorder. *J Affect Disord* **2009**, *118* (1-3), 69-78. DOI: 10.1016/j.jad.2009.01.034.
- (49) Smoski, M. J.; Rittenberg, A.; Dichter, G. S. Major depressive disorder is characterized by greater reward network activation to monetary than pleasant image rewards. *Psychiatry Res* **2011**, *194* (3), 263-270. DOI: 10.1016/j.psychres.2011.06.012.
- (50) Steele, J. D.; Kumar, P.; Ebmeier, K. P. Blunted response to feedback information in depressive illness. *Brain* **2007**, *130* (Pt 9), 2367-2374. DOI: 10.1093/brain/awm150.
- (51) Stoy, M.; Schlagenhauf, F.; Sterzer, P.; Bermpohl, F.; Hägele, C.; Suchotzki, K.; Schmack, K.; Wrase, J.; Ricken, R.; Knutson, B.; et al. Hyporeactivity of ventral striatum towards incentive stimuli in unmedicated depressed patients normalizes after treatment with escitalopram. *J Psychopharmacol* **2012**, *26* (5), 677-688. DOI: 10.1177/0269881111416686 From NLM.
- (52) Stringaris, A.; Vidal-Ribas Belil, P.; Artiges, E.; Lemaitre, H.; Gollier-Briant, F.; Wolke, S.; Vulser, H.;

Miranda, R.; Penttila, J.; Struve, M.; et al. The Brain's Response to Reward Anticipation and Depression in Adolescence: Dimensionality, Specificity, and Longitudinal Predictions in a Community-Based Sample. *Am J Psychiatry* **2015**, *172* (12), 1215-1223. DOI: 10.1176/appi.ajp.2015.14101298.

(53) Simmons, W. K.; Burrows, K.; Avery, J. A.; Kerr, K. L.; Bodurka, J.; Savage, C. R.; Drevets, W. C. Depression-Related Increases and Decreases in Appetite: Dissociable Patterns of Aberrant Activity in Reward and Interoceptive Neurocircuitry. *Am J Psychiatry* **2016**, *173* (4), 418-428. DOI: 10.1176/appi.ajp.2015.15020162.

(54) Takamura, M.; Okamoto, Y.; Okada, G.; Toki, S.; Yamamoto, T.; Ichikawa, N.; Mori, A.; Minagawa, H.; Takaishi, Y.; Fujii, Y.; et al. Patients with major depressive disorder exhibit reduced reward size coding in the striatum. *Prog Neuropsychopharmacol Biol Psychiatry* **2017**, *79* (Pt B), 317-323. DOI: 10.1016/j.pnpbp.2017.07.006 From NLM.

(55) Uhl, B.; Kuehner, C.; Kirsch, P.; Ruttorf, M.; Diener, C.; Flor, H. Altered neural reward and loss processing and prediction error signalling in depression. *Soc Cogn Affect Neurosci* **2015**, *10* (8), 1102-1112. DOI: 10.1093/scan/nsu158 From NLM.

(56) Uhl, B.; Kuehner, C.; Kirsch, P.; Ruttorf, M.; Flor, H.; Diener, C. Neural reward processing in individuals remitted from major depression. *Psychol Med* **2015**, *45* (16), 3549-3558. DOI: 10.1017/s0033291715001452 From NLM.

(57) Wiggins, J. L.; Schwartz, K. T.; Kryza-Lacombe, M.; Spechler, P. A.; Blankenship, S. L.; Dougherty, L. R. Neural reactivity to reward in school-age offspring of depressed mothers. *J Affect Disord* **2017**, *214*, 81-88. DOI: 10.1016/j.jad.2017.03.020 From NLM.



Table S1 Demographic information of all included task-based fMRI studies

| Order | Study                                   | Sample type            | MDD/HR (n1) | Depression      | HC (n2) | Mean age (SD) | Female (%) | Task                                                             | Medicated |
|-------|-----------------------------------------|------------------------|-------------|-----------------|---------|---------------|------------|------------------------------------------------------------------|-----------|
| 1     | Admon et al. 2015 <sup>15</sup>         | MDD (DSM-IV) vs. HC    | 26          | 28.53 (BDI)     | 29      | 42.6 (11.7)   | 50         | MID (reward feedback)                                            | No        |
| 2     | Admon et al. 2017 <sup>16</sup>         | MDD (DSM-IV) vs. HC    | 46          | 27.3 (BDI)      | 43      | 37.7 (14)     | 41.4       | MID (reward anticipation/feedback)                               | No        |
| 3     | Arrondo et al. 2015 <sup>17</sup>       | MDD (DSM-IV) vs. HC    | 24          | 32 (BDI)        | 21      | 33.08 (9.15)  | 29         | MID (reward anticipation/feedback)                               | Yes       |
| 4     | Chandrasekhar et al. 2015 <sup>18</sup> | MDD vs. HC             | 10          | -               | 10      | 31.9 (7.5)    | 20         | Decision-making task (reward anticipation)                       | -         |
| 5     | DelDonno et al. 2019 <sup>19</sup>      | MDD (DSM-IV) vs. HC    | 23          | 18.56 (HAMD-17) | 27      | 25.09 (3.32)  | 70         | MID (reward anticipation)                                        | No        |
| 6     | Dillon et al. 2014 <sup>20</sup>        | MDD (DSM-IV) vs. HC    | 21          | 23.62 (BDI)     | 21      | 29.15 (9.00)  | 85         | Memory task (reward feedback)                                    | No        |
| 7     | Dichter et al. 2012 <sup>21</sup>       | rMDD vs. HC            | 19          | 2.63 (BDI)      | 19      | 34.3 (12.1)   | 50         | MID (reward anticipation/feedback)                               | No        |
| 8     | Forbes et al. 2009 <sup>22</sup>        | MDD (K-SADS-PL) vs. HC | 15          | -               | 28      | 36.6 (13.3)   | 42.8       | Card guessing (reward anticipation/feedback)                     | No        |
| 9     | Gaillard et al. 2020 <sup>23</sup>      | HR vs. HC              | 16          | 6.8 (BDI)       | 16      | 23.6 (4)      | 21         | Fribourg reward task (reward anticipation/feedback)              | No        |
| 10    | Gorka et al. 2014 <sup>24</sup>         | MDD (DSM-IV) vs. HC    | 9           | 26.3 (HAMD-17)  | 18      | 13.5 (2.1)    | 70         | Passive slot machine (reward anticipation)                       | Yes       |
| 11    | Gotlib et al. 2010 <sup>25</sup>        | HR vs. HC              | 13          | 1.46 (CDI)      | 13      | 29.5 (1.1)    | 72.2       | MID (reward anticipation/feedback)                               | No        |
| 12    | Gradin et al. 2011 <sup>26</sup>        | MDD (DSM-IV) vs. HC    | 15          | 22.93 (BDI)     | 17      | 12.2 (1.7)    | 100        | Instrumental reward learning task (reward anticipation/feedback) | -         |
| 13    | Hagele et al.                           | MDD (DSM-IV/ICD-       | 24          | 24.3 (BDI)      | 54      | 40.64 (11.87) | 60         | MID (reward anticipation/feedback)                               | No        |

|    |                                    |                                                   |          |                 |     |                   |      |                                                      |     |
|----|------------------------------------|---------------------------------------------------|----------|-----------------|-----|-------------------|------|------------------------------------------------------|-----|
|    | 2015 <sup>27</sup>                 | 10) vs. HC                                        |          |                 |     | 37.7 (11.1)       | 24   | anticipation)                                        |     |
|    |                                    |                                                   |          |                 |     | 38.4              | 25   |                                                      |     |
| 14 | Hall et al. 2014 <sup>28</sup>     | MDD-FTE (DSM-IV) vs. HC                           | 14 (BDI) | 26.29 (BDI)     | 14  | 26.36 (7.43)      | 35.7 | Money game (reward feedback)                         | Yes |
|    |                                    |                                                   |          |                 |     | 28.43 (8.19)      | 42.8 |                                                      |     |
|    |                                    |                                                   |          |                 |     | 27.40             | 39   |                                                      |     |
|    |                                    | MDD-MTE (DSM-IV) vs. HC                           | 15 (BDI) | 13.40           | 15  | 47.67 (9.5)       | 73   |                                                      |     |
|    |                                    |                                                   |          |                 |     | 46.33 (11.4)      | 66.7 |                                                      |     |
| 15 | He et al. 2019 <sup>29</sup>       | Subthreshold depression vs. HC                    | 21       | 16 (BDI)        | 20  | 19.76 (1.92)      | 38   | MID and SID (reward anticipation/feedback)           | No  |
|    |                                    |                                                   |          |                 |     | 19.45 (1.57)      | 60   |                                                      |     |
| 16 | Jin et al. 2017 <sup>30</sup>      | HR vs. HC                                         | 49       | -               | 180 | All: 15.25 (0.58) | 100  | Monetary gambling task (reward feedback)             | No  |
|    |                                    |                                                   |          |                 |     |                   | 100  |                                                      |     |
| 17 | Johnston et al. 2015 <sup>31</sup> | Treatment resistant depression (MINI PLUS) vs. HC | 19       | 32.42 (BDI)     | 21  | 50.79 (10.6)      | 79   | Modified Pessiglione reward task (reward feedback)   | Yes |
|    |                                    |                                                   |          |                 |     | 46.14 (13.97)     | 71   |                                                      |     |
| 18 | Knutson et al. 2008 <sup>32</sup>  | MDD (DSM) vs. HC                                  | 14       | 25.38 (BDI)     | 12  | 30.7 (8.8)        | 64   | MID (reward anticipation/feedback)                   | No  |
|    |                                    |                                                   |          |                 |     | 28.6 (4.2)        | 67   |                                                      |     |
| 19 | Kumar et al. 2018 <sup>33</sup>    | MDD (DSM-IV) vs. HC                               | 25       | 26.26 (BDI)     | 26  | 25.25 (5.46)      | 76   | Reward leaning task (reward feedback)                | No  |
|    |                                    |                                                   |          |                 |     | 26.31 (7.96)      | 73   |                                                      |     |
| 20 | Liu et al. 2017 <sup>34</sup>      | MDD (DSM-IV) vs. HC                               | 21       | 24.05 (HAMD-24) | 17  | 30.7 (8.9)        | 57   | Probabilistic reward learning task (reward feedback) | No  |
|    |                                    |                                                   |          |                 |     | 28.3 (5.2)        | 59   |                                                      |     |
| 21 | Luking et al. 2016 <sup>35</sup>   | HR vs. HC                                         | 16       | 53.19 (CDI)     | 32  | 9.2 (1.0)         | 50   | Card guessing (reward feedback)                      | No  |
|    |                                    |                                                   |          |                 |     | 9.0 (1.1)         | 53   |                                                      |     |
| 22 | Mori et al. 2016 <sup>36</sup>     | Subthreshold depression vs. HC                    | 15       | 18.1 (BDI)      | 15  | 18.5 (0.6)        | 60   | MID (reward anticipation)                            | No  |
|    |                                    |                                                   |          |                 |     | 19.1 (0.7)        | 47   |                                                      |     |
| 23 | Olino et al. 2011 <sup>37</sup>    | MDD vs. HC                                        | 10       | -               | 16  | All: 13.3 (2.4)   | 73   | Card guessing (reward anticipation)                  | No  |
|    |                                    |                                                   |          |                 |     |                   |      |                                                      |     |
| 24 | Olino et al. 2014 <sup>38</sup>    | HR vs. HC                                         | 14       | -               | 12  | 15.8 (3.0)        | 78.6 | Card guessing (reward anticipation/feedback)         | No  |
|    |                                    |                                                   |          |                 |     | 15.5 (2.5)        | 66.7 |                                                      |     |
|    |                                    |                                                   |          |                 |     | 15.7              | 73   |                                                      |     |
| 25 | Pizzagalli et al.                  | MDD (DSM-IV) vs.                                  | 30       | 27.48 (BDI)     | 31  | 43.1 (12.9)       | 42   | MID (reward                                          | No  |

|    |                                         |        |  |                                                 |            |                 |    |               |      |                                                          |     |
|----|-----------------------------------------|--------|--|-------------------------------------------------|------------|-----------------|----|---------------|------|----------------------------------------------------------|-----|
|    | 2009 <sup>39</sup>                      |        |  | HC                                              |            |                 |    | 38.8 (14.4)   | 50   | anticipation/feedback)                                   |     |
| 26 | Redlich et al. 2015 <sup>40</sup>       | et al. |  | MDD (DSM-IV) vs. HC                             | 33         | 27.88 (BDI)     | 34 | 38.5 (12.1)   | 51.5 | Card guessing (reward feedback)                          | Yes |
| 27 | Remijnse et al. 2009 <sup>41</sup>      | et al. |  | MDD (DSM-IV) vs. HC                             | 20         | 25.6 (BDI)      | 27 | 38.6 (12.3)   | 47   | Reversal learning task (reward feedback)                 | Yes |
| 28 | Robinson et al. 2012 <sup>42</sup>      | et al. |  | MDD (DSM-IV) vs. HC                             | 13         | 20 (HAMD-21)    | 14 | 35            | 40   | Pavlovian reward-punishment prediction (reward feedback) | No  |
| 29 | Sankar et al. 2019 <sup>43</sup>        | et al. |  | MDD (DSM-IV) vs. HC                             | 20         | 14.88 (HAMD-17) | 20 | 32            | 70   | MID (reward anticipation)                                | Yes |
|    |                                         |        |  |                                                 |            |                 |    | 36 (11)       | 38   |                                                          |     |
|    |                                         |        |  |                                                 |            |                 |    | 31 (6)        | 43   |                                                          |     |
|    |                                         |        |  |                                                 |            |                 |    | (10.84)       | 100  |                                                          |     |
|    |                                         |        |  |                                                 |            |                 |    | 30.25 (10.99) | 100  |                                                          |     |
| 30 | Satterthwaite et al. 2015 <sup>44</sup> | et al. |  | MDD (DSM-IV) vs. HC                             | 25         | 25.16 (BDI)     | 37 | 38.8 (12.8)   | 44   | MID (reward feedback)                                    | Yes |
| 31 | Schneider et al. 2020 <sup>45</sup>     | et al. |  | MDD and subthreshold depression (DSM-IV) vs. HC | 41         | -               | 25 | 39.5 (11.6)   | 49   | Reward anticipation task                                 | No  |
|    |                                         |        |  |                                                 |            |                 |    | 35.9 (13.4)   | 66   |                                                          |     |
|    |                                         |        |  |                                                 |            |                 |    | 32.1 (10.3)   | 48   |                                                          |     |
| 32 | Segarra et al. 2016 <sup>46</sup>       | et al. |  | MDD (DSM-IV) vs. HC                             | 24         | 32.62 (BDI)     | 21 | 33.08 (9.15)  | 29   | Simulated slot machine (reward feedback)                 | Yes |
|    |                                         |        |  |                                                 |            |                 |    | 34.33 (10.11) | 19   |                                                          |     |
| 33 | Sharp et al. 2014 <sup>47</sup>         | et al. |  | HR + MDD (DSM-IV) vs. HC                        | 33 (19+14) | 16.09 (BDI)     | 19 | 13.3 (1.8)    | 100  | Card guessing (reward anticipation/feedback)             | -   |
| 34 | Smoski et al. 2009 <sup>48</sup>        | et al. |  | MDD (DSM-IV) vs. HC                             | 14         | -               | 15 | 13.7 (1.8)    | 100  | Wheel of fortune (reward anticipation/feedback)          | No  |
|    |                                         |        |  |                                                 |            |                 |    | 34.8 (14.3)   | 50   |                                                          |     |
|    |                                         |        |  |                                                 |            |                 |    | 30.8 (9.7)    | 60   |                                                          |     |
| 35 | Smoski et al. 2011 <sup>49</sup>        | et al. |  | MDD (DSM-IV) vs. HC                             | 9          | 16.7 (BDI)      | 13 | 34.4 (15.1)   | -    | MID (reward anticipation/feedback)                       | Yes |
| 36 | Steele et al. 2007 <sup>50</sup>        | et al. |  | MDD (DSM-IV) vs. HC                             | 15         | 36.9 (BDI)      | 14 | 26.2 (6.3)    |      | Gambling task (reward feedback)                          | Yes |
| 37 | Stoy et al. 2012 <sup>51</sup>          | et al. |  | MDD (DSM-IV) vs. HC                             | 15         | 23.6 (BDI)      | 15 | 45.9 (10.7)   | 73   |                                                          |     |
|    |                                         |        |  |                                                 |            |                 |    | 43.0 (13.3)   | 50   |                                                          |     |
|    |                                         |        |  |                                                 |            |                 |    | 41.9 (12.2)   | 33   | MID (reward anticipation)                                | Yes |
|    |                                         |        |  |                                                 |            |                 |    | 39.5 (11.9)   | 33   |                                                          |     |

|    |                                      |                                |     |              |     |               |      |                                                                         |     |
|----|--------------------------------------|--------------------------------|-----|--------------|-----|---------------|------|-------------------------------------------------------------------------|-----|
| 38 | Stringaris et al. 2015 <sup>52</sup> | MDD (DSM-IV) vs. HC            | 22  | -            | 123 | 14.4 (0.3)    | 86   | MID (reward anticipation)                                               | Yes |
|    |                                      | Subthreshold depression vs. HC | 101 | -            | 123 | 14.4 (0.4)    | 73   |                                                                         |     |
|    |                                      |                                |     |              |     | 14.5 (0.4)    | 65   | MID (reward anticipation)                                               | Yes |
| 39 | Simmons et al. 2017 <sup>53</sup>    | MDD (DSM-IV) vs. HC            | 32  | 23 (HAMD-17) | 16  | 35.8          | 72   | Food task (reward feedback)                                             | No  |
| 40 | Takamura et al. 2017 <sup>54</sup>   | MDD (DSM-IV) vs. HC            | 12  | 30.8 (BDI)   | 12  | 33.9          | 69   |                                                                         |     |
|    |                                      |                                |     |              |     | 44.0 (13.2)   | 50   | MID (reward anticipation)                                               | Yes |
|    |                                      |                                |     |              |     | 38.3 (8.46)   | 50   |                                                                         |     |
| 41 | Ubl et al. 2015a <sup>55</sup>       | MDD (DSM-IV) vs. HC            | 30  | 25.50 (BDI)  | 28  | 46 (11.85)    | 53.3 | Modified version of a paradigm by Kirsch (reward anticipation/feedback) | No  |
|    |                                      |                                |     |              |     | 43.96 (12.85) | 53.6 |                                                                         |     |
| 42 | Ubl et al. 2015b <sup>56</sup>       | rMDD (DSM-IV) vs. HC           | 23  | 5.08 (BDI)   | 23  | 41.17 (12.08) | 69.6 | Monetary reward paradigm (reward anticipation/feedback)                 | No  |
|    |                                      |                                |     |              |     | 42.74 (12.19) | 60.9 |                                                                         |     |
| 43 | Wiggins et al. 2017 <sup>57</sup>    | HR vs. HC                      | 27  | -            | 19  | 7.44 (0.73)   | 52   | MID (reward anticipation/feedback)                                      | No  |
|    |                                      |                                |     |              |     | 7.64 (0.84)   | 74   |                                                                         |     |

Abbreviations: BDI, Beck Depression Inventory; CDI, Child Depression Inventory; HAMD, Hamilton Depression Scale; HC, healthy control; HR, high-risk group (individuals who have first-degree relatives with a history of mental illness); K-SADS-PL, the Schedule for affective disorder and schizophrenia-present and lifetime version; MDD, major depressive disorder; MID, monetary incentive delay task; MINI PLUS, Mini-international psychiatric interview; rMDD, remitted MDD; SD, standard deviation; SID, social incentive delay task.

Table S2 Summary of methods and results of all included studies

| Study                     | Whole-brain analysis | Software | Reward phase                            | Comparative results                                                                                                                                                                                                                                             | Activation (HC)                        | Activation (depression) |
|---------------------------|----------------------|----------|-----------------------------------------|-----------------------------------------------------------------------------------------------------------------------------------------------------------------------------------------------------------------------------------------------------------------|----------------------------------------|-------------------------|
| Admon et al. 2015         | Yes                  | FSL      | Outcome (reward > neutral)              | L_Caudate, R_Caudate                                                                                                                                                                                                                                            | -                                      | -                       |
| Admon et al. 2017         | Yes                  | SPM      | Anticipation/outcome (reward > penalty) | No results                                                                                                                                                                                                                                                      | -                                      | -                       |
| Arrondo et al. 2015       | Yes                  | FSL      | Anticipation (reward > neutral)         | R_NAc, Frontal pole, L_NAc                                                                                                                                                                                                                                      | No label found, SFG, L_Thalamus, R_NAc | -                       |
| Chandrasekhar et al. 2015 | Yes                  | SPM      | Anticipation (reward > loss)            | R_MTG                                                                                                                                                                                                                                                           | -                                      | -                       |
| DelDonno et al. 2019      | Yes                  | SPM      | Anticipation (reward > neutral)         | Declive, Cuneus, Precuneus                                                                                                                                                                                                                                      | -                                      | -                       |
| Dillon et al. 2014        | Yes                  | SPM      | Outcome (reward > neutral)              | R_parahippocampal gyrus, VTA/SN                                                                                                                                                                                                                                 | -                                      | -                       |
| Dichter et al. 2012       | Yes                  | FSL      | Anticipation (reward > neutral)         | R_Anterior cerebellum, L_Caudate, R_ACC, L_ACC, R_MFG, R_FOC, L_Fusiform gyrus, R_Fusiform gyrus, R_Anterior paracingulate gyrus, L_Anterior parahippocampal gyrus, L_SPL, R_Precuneus, R_SMC, L_Posterior supramarginal gyrus, R_Posterior supramarginal gyrus | -                                      | -                       |
|                           |                      |          | Outcome (reward > neutral)              | R_Angular gyrus, L_Central opercular cortex, R_Central                                                                                                                                                                                                          | -                                      | -                       |

|                      |     |        |                                  |                                                                                                                                                                                                                                                                                                                                                    |          |                                                                                |                                                                         |
|----------------------|-----|--------|----------------------------------|----------------------------------------------------------------------------------------------------------------------------------------------------------------------------------------------------------------------------------------------------------------------------------------------------------------------------------------------------|----------|--------------------------------------------------------------------------------|-------------------------------------------------------------------------|
|                      |     |        |                                  | opercular cortex, L_PCC,<br>L_FOC, R_FOC,<br>R_Frontal pole,<br>L_Insular cortex,<br>R_Intracalcarine cortex,<br>L_Planum polare,<br>L_Precentral gyrus,<br>R_Lateral SOG,<br>L_Supramarginal gyrus<br>(anterior),<br>R_Supramarginal gyrus<br>(posterior), L_Fusiform<br>gyrus, L_Posterior STG,<br>R_Temporal pole,<br>R_Thalamus,<br>L_Thalamus |          |                                                                                |                                                                         |
| Forbes et al. 2009   | No  | SPM    | Anticipation (reward > baseline) | L_Caudate, L_DLPFC,                                                                                                                                                                                                                                                                                                                                | R_DLPFC, | R_Caudate body                                                                 | L_DLPFC, R_DLPFC, R_Medial frontal gyrus, L_Orbital gyrus, R_MFG, L_MFG |
|                      |     |        | Outcome (reward > baseline)      | L_Caudate, L_Medial frontal gyrus, L_DLPFC, R_DLPFC                                                                                                                                                                                                                                                                                                |          | L_Caudate head                                                                 | R_DLPFC, L_Medial frontal gyrus, L_DLPFC, R_MFG, L_SFG, R_SFG           |
| Gaillard et al. 2020 | Yes | Others | Anticipation (reward > baseline) | R_Cuneus                                                                                                                                                                                                                                                                                                                                           |          | L_Fusiform, R_ITG, L_Lateral occipital gyrus, R_Lateral occipital gyrus, R_SPL | L_Lateral occipital gyrus, R_Lateral occipital gyrus, L_SPL             |
| Gorka et al. 2014    | Yes | SPM    | Anticipation (reward > neutral)  | R_dorsal ACC                                                                                                                                                                                                                                                                                                                                       |          | L_NAc                                                                          | -                                                                       |
| Gotib et al. 2010    | No  | SPM    | Anticipation (reward > neutral)  | R_Insula, L_Putamen, L_Insula                                                                                                                                                                                                                                                                                                                      | -        |                                                                                | -                                                                       |
|                      |     |        | Outcome (reward > neutral)       | R_ACC, L_PCC, L_MCC, L_Putamen, L_ACC,                                                                                                                                                                                                                                                                                                             | -        |                                                                                | -                                                                       |

|                    |     |        |                                       |                                                                            |                                                                                                                                              |                                                                                                   |
|--------------------|-----|--------|---------------------------------------|----------------------------------------------------------------------------|----------------------------------------------------------------------------------------------------------------------------------------------|---------------------------------------------------------------------------------------------------|
|                    |     |        |                                       | R_Anterior thalamic nucleus,                                               |                                                                                                                                              |                                                                                                   |
| Gradin et al. 2011 | Yes | SPM    | Anticipation                          | R_Hippocampus, R_paterior parahippocampal gyrus                            | L_Amygdala-hippocampal complex, R_Amygdala-hippocampal complex, L_Posterior parahippocampal gyrus, R_Posterior parahippocampal gyrus         | L_Amygdala-hippocampal complex, R_Amygdala-hippocampal complex, L_Posterior parahippocampal gyrus |
|                    |     |        | Outcome (reward prediction error)     | L_Putamen, R_NAc, L_NAc, L_Caudate, R_Caudate, Midbrain, R_Hippocampus     | L_Putamen, R_Putamen, L_NAc, R_NAc, L_Amygdala-hippocampal complex, R_Amygdala-hippocampal complex, L_Caudate, R_Caudate, R_insula, Midbrain | L_Amygdala, R_Amygdala, R_Hippocampus, R_Insula                                                   |
| Hagele et al. 2015 | Yes | SPM    | Anticipation (reward > neutral)       | R_VS                                                                       | -                                                                                                                                            | -                                                                                                 |
| Hall et al. 2014   | Yes | Others | Outcome (reward > punishment)         | R_vmPFC, L_vmPFC                                                           | -                                                                                                                                            | -                                                                                                 |
|                    |     |        | Outcome (large reward > small reward) | R_NAc, L_Caudate, R_ACC, L_ACC                                             | -                                                                                                                                            | -                                                                                                 |
|                    |     |        | Outcome (reward > punishment)         | R_vmPFC, L_vmPFC, R_ACC, L_ACC, R_NAc, L_NAc, R_Hippocampus, L_Hippocampus | -                                                                                                                                            | -                                                                                                 |
|                    |     |        | Outcome (large reward > small reward) | R_NAc, L_NAc, R_ACC, L_ACC                                                 | -                                                                                                                                            | -                                                                                                 |
| He et al. 2019     | Yes | SPM    | Anticipation (reward > baseline)      | No significant results                                                     | R_Caudate, L_IOG                                                                                                                             | R_Caudate, L_Fusiform, L_IOG                                                                      |
|                    |     |        | Outcome (reward > baseline)           | No significant results                                                     | L_IOG, R_Lingual gyrus,                                                                                                                      | R_IOG, R_Calcarine sulcus,                                                                        |

|                      |     |        |                                   |                                                          |                                                                           |                                                                                                                                                                                                                   |                                                                                                                                                                                                                                              |                                                                                   |
|----------------------|-----|--------|-----------------------------------|----------------------------------------------------------|---------------------------------------------------------------------------|-------------------------------------------------------------------------------------------------------------------------------------------------------------------------------------------------------------------|----------------------------------------------------------------------------------------------------------------------------------------------------------------------------------------------------------------------------------------------|-----------------------------------------------------------------------------------|
|                      |     |        | baseline)                         |                                                          |                                                                           | R_IOG, L_Fusiform, R_Fusiform                                                                                                                                                                                     | R_Putamen, L_MOG,                                                                                                                                                                                                                            | R_MOG, L_Calcarine sulcus, L_MOG, L_IOG, R_Fusiform, L_Fusiform, R_ITG, R_Putamen |
| Jin et al. 2017      | No  | SPM    | Outcome (reward > neutral)        | No significant results                                   |                                                                           | -                                                                                                                                                                                                                 | -                                                                                                                                                                                                                                            | -                                                                                 |
| Johnston et al. 2015 | Yes | SPM    | Outcome (reward > neutral)        | R_Insula, L_Insula, L_Subgenual ACC, L_NAc, R_PCC, L_PCC | NAc/subgenual ACC/PCC, Lateral cortical regions                           |                                                                                                                                                                                                                   | Subgenual ACC, Insula/amygdala/hippocampus, DLPFC                                                                                                                                                                                            |                                                                                   |
| Knutson et al. 2008  | Yes | Others | Anticipation (reward > neutral)   | L_SFG, L_ACC, L_Precentral gyrus, R_Postcentral gyrus    | R_ACC, L_Caudate, R_Putamen, R_NAc, L_NAc, R_Caudate, L_Putamen, Thalamus |                                                                                                                                                                                                                   | R_SFG, R_NAc, R_Caudate, R_Putamen, L_NAc, L_Caudate tail, R_IFG, ACC, L_Putamen, Medial frontal gyrus, R_Precentral gyrus, R_MFG, R_Thalamus, L_Thalamus, R_Hippocampus, R_Postcentral gyrus, R_IPL, L_IPL, R_SPL, L_Precuneus, R_Precuneus |                                                                                   |
|                      |     |        | Outcome (reward > neutral)        | R_mPFC, R_Putamen, L_Putamen, L_Postcentral L_IPL        | L_Insula, L_SFG, gyrus,                                                   | L_mPFC, L_Caudate head, R_Caudate head, L_Putamen, Cingulate, L_Amygdala, R_Precentral gyrus, R_Caudate tail, L_Caudate tail, L_Hippocampus, R_Hippocampus, L_Postcentral gyrus, L_IPL, R_IPL, L_Precuneus, R_SPL | mPFC, R_Caudate head, L_Caudate tail, R_Caudate tail, L_PCC                                                                                                                                                                                  |                                                                                   |
| Kumar et al. 2018    | Yes | SPM    | Outcome (reward prediction error) | No significant results                                   |                                                                           | R_Visual cortex, R_Calcarine cortex, R_Anterior insula, R_Putamen                                                                                                                                                 | L_Visual cortex, L_IFG, L_SPL, L_Anterior insula, PCC, R_Precentral gyrus                                                                                                                                                                    |                                                                                   |



|                        |     |     |                                  |                                                                                                                                                                                                 |   |   |
|------------------------|-----|-----|----------------------------------|-------------------------------------------------------------------------------------------------------------------------------------------------------------------------------------------------|---|---|
| Liu et al. 2017        | Yes | SPM | Outcome (reward > neutral)       | No significant results                                                                                                                                                                          | - | - |
| Luking et al. 2016     | Yes | SPM | Outcome (reward > neutral)       | R_Caudate, R_ventral putamen, L_Anterior insula, R_Anterior insula                                                                                                                              | - | - |
|                        |     |     | Outcome (reward > loss)          | R_Medial globus pallidus, R_Parahippocampal gyrus                                                                                                                                               | - | - |
| Mori et al. 2016       | Yes | SPM | Anticipation (reward > neutral)  | L_Angular gyrus, R_Angular gyrus, R_MFG, R_IPL                                                                                                                                                  | - | - |
| Olino et al. 2011      | No  | SPM | Anticipation (reward > baseline) | L_Caudate body, L_Caudate tail, R_Caudate body, R_Caudate head                                                                                                                                  | - | - |
| Olino et al. 2014      | Yes | SPM | Anticipation (reward > baseline) | Caudate                                                                                                                                                                                         | - | - |
|                        |     |     | Outcome (reward > baseline)      | No significant results                                                                                                                                                                          | - | - |
| Pizzagalli et al. 2009 | Yes | FSL | Anticipation (reward > neutral)  | L_Putamen, R_Occipitofrontal fasciculus, R_MOG, R_Parahippocampal gyrus, R_IFG, L_IFG, R_MFG, L_MFG, R_Subgenual ACC, R_STG, L_Occipitofrontal fasciculus, L_IPL, R_Lingual gyrus, R_Cerebellum | - | - |

|                           |     |        |                                  |                                                                                                                                                                                |              |                                                    |
|---------------------------|-----|--------|----------------------------------|--------------------------------------------------------------------------------------------------------------------------------------------------------------------------------|--------------|----------------------------------------------------|
|                           |     |        | Outcome (reward > neutral)       | R_Caudate, L_Caudate, L_NAc, R_Insula, L_Insula, R_IFG, R_MFG, R_Medial frontal gyrus, L_Precentral gyrus, R_Rostral ACC, R_Dorsal ACC, L_PCC, R_MTG, L_Cerebellum, L_Fusiform | -            | -                                                  |
| Redlich et al. 2015       | Yes | SPM    | Outcome (reward > neutral)       | No significant results                                                                                                                                                         | -            | -                                                  |
| Remijnse et al. 2009      | Yes | SPM    | Outcome (reward > neutral)       | R_STG, L_Precentral gyrus, R_Occipital cortex, L_Putamen                                                                                                                       | -            | -                                                  |
| Robinson et al. 2012      | Yes | SPM    | Outcome (unexpected reward)      | R_Putamen, L_MCC, L_MOG                                                                                                                                                        | -            | -                                                  |
| Sankar et al. 2019        | No  | FSL    | Anticipation (reward > neutral)  | No significant results                                                                                                                                                         | L_NAc, R_NAc | L_NAc, R_NAc, R_Anterior insula, L_Anterior insula |
| Satterthwaite et al. 2015 | No  | FSL    | Outcome (reward > loss)          | L_VS, L_Anterior insula, VTA, ACC, R_Thalamus                                                                                                                                  | -            | -                                                  |
| Schneider et al. 2020     | No  | SPM    | Anticipation (reward > neutral)  | No significant results                                                                                                                                                         | -            | -                                                  |
| Segarra et al. 2016       | Yes | FSL    | Outcome (reward > neutral)       | Medial frontal cortex, R_VS, L_Lingual gyrus, L_OFC, R_ITG and MTG                                                                                                             | -            | -                                                  |
| Sharp et al. 2014         | Yes | Others | Anticipation (reward > baseline) | No significant results                                                                                                                                                         | -            | -                                                  |
|                           |     |        | Outcome (reward > baseline)      | R_MTG, R_IFG, R_VS, R_IFG, R_IPL, R_Supramarginal gyrus, R_Medial frontal gyrus, L_Cingulate gyrus                                                                             | -            | -                                                  |

|                    |     |     |                                 |                                                                                                                                                                                                                                                                                                                                                                                               |   |   |
|--------------------|-----|-----|---------------------------------|-----------------------------------------------------------------------------------------------------------------------------------------------------------------------------------------------------------------------------------------------------------------------------------------------------------------------------------------------------------------------------------------------|---|---|
| Smoski et al. 2009 | Yes | FSL | Anticipation (reward > neutral) | L_Parietal operculum<br>cortex, L_Caudate,<br>L_ACC, R_PCC, L_PCC,<br>L_IFG, R_MFG, L_MFG,<br>L_Frontal pole,<br>L_Hippocampus,<br>L_Lingual gyrus, L_IOG,<br>R_IOG, L_SOG,<br>L_Fusiform,<br>R_Postcentral gyrus,<br>L_Precentral gyrus,<br>R_Precentral gyrus,<br>L_Precuneous,<br>R_Precuneous,<br>L_Subcallosal cortex,<br>L_ITG, L_MTG,<br>L_Temporal pole,<br>R_Thalamus,<br>L_Thalamus | - | - |
|                    |     |     | Outcome (reward > neutral)      | R_Angular gyrus,<br>R_Cunues, R_IFG,<br>R_Fusiform,<br>R_Precuneous,<br>L_Temporal pole,<br>R_Thalamus,<br>L_Thalamus, L_Cunues,<br>R_MFG, L_Lingual gyrus,<br>R_SOG, L_SOG                                                                                                                                                                                                                   | - | - |
| Smoski et al. 2011 | Yes | FSL | Anticipation (reward > neutral) | R_OFC,<br>L_Hippocampus,<br>R_Occipital pole,<br>R_Subcallosal cortex                                                                                                                                                                                                                                                                                                                         | - | - |

|                        |     |        |                                                                  |                                                                                                                                                                     |                                                                                                                                                        |                                                                                                                                                                                     |
|------------------------|-----|--------|------------------------------------------------------------------|---------------------------------------------------------------------------------------------------------------------------------------------------------------------|--------------------------------------------------------------------------------------------------------------------------------------------------------|-------------------------------------------------------------------------------------------------------------------------------------------------------------------------------------|
|                        |     |        | Outcome (reward > neutral)                                       | No significant results                                                                                                                                              | -                                                                                                                                                      | -                                                                                                                                                                                   |
| Steele et al. 2007     | No  | SPM    | Outcome (reward > loss)                                          | R_VS, L_VS                                                                                                                                                          | L_VS, R_VS                                                                                                                                             | No significant results                                                                                                                                                              |
| Stoy et al. 2012       | Yes | SPM    | Anticipation (reward > neutral)                                  | No significant results                                                                                                                                              | R_Lentiform, L_Lentiform, Thalamus, L_MOG, Cuneus, L_MTG                                                                                               | No significant results                                                                                                                                                              |
| Stringaris et al. 2015 | No  | SPM    | Anticipation (reward > neutral) (MDD vs. HC)                     | R_Caudate head, R_Caudate, L_Caudate, R_Medial frontal gyrus, R_SFG, L_SFG, L_MFG                                                                                   | -                                                                                                                                                      | -                                                                                                                                                                                   |
|                        |     |        | Anticipation (reward > neutral) (subthreshold depression vs. HC) | L_Caudate head, L_Putamen, R_Caudate head, R_Caudate                                                                                                                | -                                                                                                                                                      | -                                                                                                                                                                                   |
| Simmons et al. 2017    | No  | Others | Outcome (reward > baseline)                                      | R_Anterior insula, L_Dorsal mid-insula, R_Ventral pallidum, R_VS, L_VS, L_vmPFC, R_OFC, R_Dorsal mid-insula, L_Anterior insula, L_Caudal anterior insula, R_Putamen | R_Visual cortex, L_Visual cortex, L_Insula, L_OFC, R_Dorsal mid-insula, R_Amygdala, R_OFC                                                              | -                                                                                                                                                                                   |
| Takamura et al. 2017   | No  | SPM    | Anticipation (reward > neutral)                                  | No significant results                                                                                                                                              | -                                                                                                                                                      | -                                                                                                                                                                                   |
| Ubl et al. 2015a       | No  | SPM    | Anticipation (high reward > neutral)                             | R_NAc, R_OFC, L_Rostral ACC                                                                                                                                         | (whole-brain analysis): R_calcarine sulcus, R_SOG, R_IOG, L_MOG, L_IOG, L_thalamus, R_thalamus, L_pallidum, L_postcentral cortex, L_precentral cortex, | (whole-brain analysis): L_IOG, L_MOG, R_SOG, R_MOG, R_IOG, L_precentral cortex, L_SMC, R_SMC, L_SFG, R_lingual gyrus, R_thalamus, R_cerebellum_6, L_thalamus, L_hippocampus, R_SFG, |

---

|                           |                            |
|---------------------------|----------------------------|
| L_SMC, R_MCC, R_SMC,      | L_cerebelum_6, R_putamen,  |
| R_ACC, L_ACC,             | L_pallidum, R_cerebelum_3, |
| R_fusiform, R_MFG,        | R parahippocampal cortex,  |
| L_cerebelum_6,            | L parahippocampal cortex   |
| L_fusiform, R_precentral  | R_pallidum, L_postcentral  |
| cortex, R_postcentral     | cortex, L lingual gyrus    |
| cortex, L_precuneus,      |                            |
| L_IPL, L_superior         |                            |
| temporal pole, L_inferior |                            |
| OFC, L_MFG, R_rolandic    |                            |
| operculum, R_superior     |                            |
| temporal pole, L_MTG,     |                            |
| R_caudate nucleus,        |                            |
| R_putamen, L_STG,         |                            |
| R_precuneus, R_MFG,       |                            |
| L_caudate nucleus,        |                            |
| R_SFG, L_supramarginal    |                            |
| gyrus, L_crus1 cerebelum, |                            |
| L_MCC                     |                            |
| R_cerebelum_4_5,          |                            |
| R angular gyrus, L_SFG,   |                            |
| L_putamen,                |                            |
| L_hippocampus,            |                            |
| R_supramarginal gyrus,    |                            |
| L_lobule paracentral      |                            |
| cortex, L_insula, L_SPL,  |                            |
| L_rolandic operculum      |                            |
| R_postcentral cortex      |                            |
| L lingual gyrus           |                            |
| L_calcarine sulcus        |                            |
| R_inferior OFC            |                            |
| L_IPL                     |                            |

---

|                     |     |        | Outcome (high reward > neutral)  | No significant results           | R_inferior frontal cortex                                                                                                                 | operculum                                                                        |                                                                                                                                                                                                                   |
|---------------------|-----|--------|----------------------------------|----------------------------------|-------------------------------------------------------------------------------------------------------------------------------------------|----------------------------------------------------------------------------------|-------------------------------------------------------------------------------------------------------------------------------------------------------------------------------------------------------------------|
|                     |     |        |                                  |                                  | L_MOG, L_insula, R_caudate, R_ACC, cortex, R angular gyrus, R calcarine sulcus, L pallidum, cortex, R fusiform, L inferior frontal cortex | R_MOG, R_insula, nucleus, R_precentral gyrus, L_precentral SMC, R_MCC, operculum | R lingual gyrus, R calcarine sulcus, R_MOG, R_insula, R inferior OFC, L insula, R_Hippocampus, R_ACC, R pallidum, R middle OFC, R thalamus, L caudate nucleus, Vermis_1_2, L thalamus, L_precentral cortex, R_SFG |
| Ubl et al. 2015b    | No  | SPM    | Anticipation (reward > neutral)  | L_Hippocampus, R_Amygdala, R_SFG | -                                                                                                                                         | -                                                                                |                                                                                                                                                                                                                   |
|                     |     |        | Outcome (reward > neutral)       | No significant results           | -                                                                                                                                         | -                                                                                |                                                                                                                                                                                                                   |
| Wiggins et al. 2017 | Yes | Others | Anticipation (reward > baseline) | No significant results           | -                                                                                                                                         | -                                                                                |                                                                                                                                                                                                                   |
|                     |     |        | Outcome (reward > baseline)      | R_DLPFC, R_Parahippocampal gyrus | -                                                                                                                                         | -                                                                                |                                                                                                                                                                                                                   |

Abbreviations: ACC, anterior cingulate cortex; DE, depressed-appetite decrease subgroup; DLPFC, dorsolateral prefrontal cortex; FOC, frontal orbital cortex; IFG, inferior frontal gyrus; IN, depressed-appetite increased subgroup; IPL, inferior parietal lobe; ITG, inferior temporal gyrus; MCC, middle cingulate cortex; MFG, middle frontal gyrus; MOG, middle occipital gyrus; mPFC, medial prefrontal cortex; MTG, middle temporal gyrus; NAc, nucleus accumbens; OFC, orbitofrontal cortex; PCC, posterior cingulate gyrus; SFG, superior frontal gyrus; SMC, supplementary motor cortex; SOG, superior occipital gyrus; SPL, superior parietal lobule; STG, superior temporal gyrus; vmPFC, ventral medial prefrontal cortex; VS, ventral striatum; VTA/SN, ventral tegmental area/substantia nigra.

Table S3 Results of meta-analysis for comparative studies with whole-brain method (depressed subjects vs. healthy controls)

| Brain area              |        | Voxels | MNI coordinates |     |     | Z score | P value |
|-------------------------|--------|--------|-----------------|-----|-----|---------|---------|
|                         |        |        | x               | y   | z   |         |         |
| Anticipation*           |        |        |                 |     |     |         |         |
| R_Supplementary area    | motor  | 35     | 6               | 4   | 46  | 2.840   | 0.002   |
| R_Cerebellum            | lobule | 157    | 32              | -62 | -22 | -2.788  | 0.004   |
| VI/fusiform gyrus       |        |        |                 |     |     |         |         |
| Feedback**              |        |        |                 |     |     |         |         |
| R_Lentiform/putamen     |        | 174    | 22              | 4   | -4  | -4.329  | < 0.001 |
| L_Caudate               |        | 129    | -10             | 2   | 16  | -4.033  | < 0.001 |
| L_Caudate               |        | 53     | -6              | 4   | -6  | -3.825  | < 0.001 |
| R_Caudate               |        | 46     | 12              | 12  | 4   | -3.500  | < 0.001 |
| R_Parahippocampal gyrus |        | 11     | 20              | -20 | -18 | -3.317  | < 0.001 |

\*: Results  $p < 0.01$ , uncorrected, cluster size  $> 10$  voxels.

\*\* : Results  $p < 0.001$ , uncorrected, cluster size  $> 10$  voxels.

Table S4. Significant ALFF results (anticipatory and consummatory pleasure-related) across groups (GRF corrected, voxel level < 0.01, cluster level < 0.05).

| Contrast                  | Cluster location                    | Peak MNI |     |     | F/T value |
|---------------------------|-------------------------------------|----------|-----|-----|-----------|
|                           |                                     | x        | y   | z   |           |
| Comparison among 4 groups | Right_PHipp                         | 42       | -45 | -9  | 6.08      |
|                           | Left_Hipp                           | -30      | -18 | -15 | 6.22      |
|                           | Left_PHipp/Hipp                     | -33      | -39 | -6  | 5.78      |
|                           | Right_Caudate                       | 18       | 21  | 6   | 5.55      |
| SubA vs. SubB             | Left_PHipp/Hipp                     | -21      | -42 | -3  | -3.11     |
|                           | Left_Hipp/Putamen                   | -30      | -18 | -15 | -4.14     |
| SubA vs. SubC             | Left_Hipp                           | -30      | -18 | -15 | -3.26     |
|                           | Left_PHipp/Hipp                     | -33      | -42 | -3  | -3.15     |
| SubB vs. SubC:            | Right_PHipp                         | 33       | -30 | -15 | 2.98      |
| SubA vs. HC               | No brain region above the threshold |          |     |     |           |
| SubB vs. HC               | Right_PHipp/Hipp                    | 33       | -30 | -15 | 3.81      |
| SubC vs. HC               | Right_Caudate                       | 18       | 21  | 3   | 3.35      |

Abbreviations: ACC, anterior cingulate cortex; Hipp, Hippocampus; PHipp, Parahippocampal gyrus; SubA, SubB, and SubC, SubgroupA, SubgroupB, and SubgroupC; HC, healthy control.



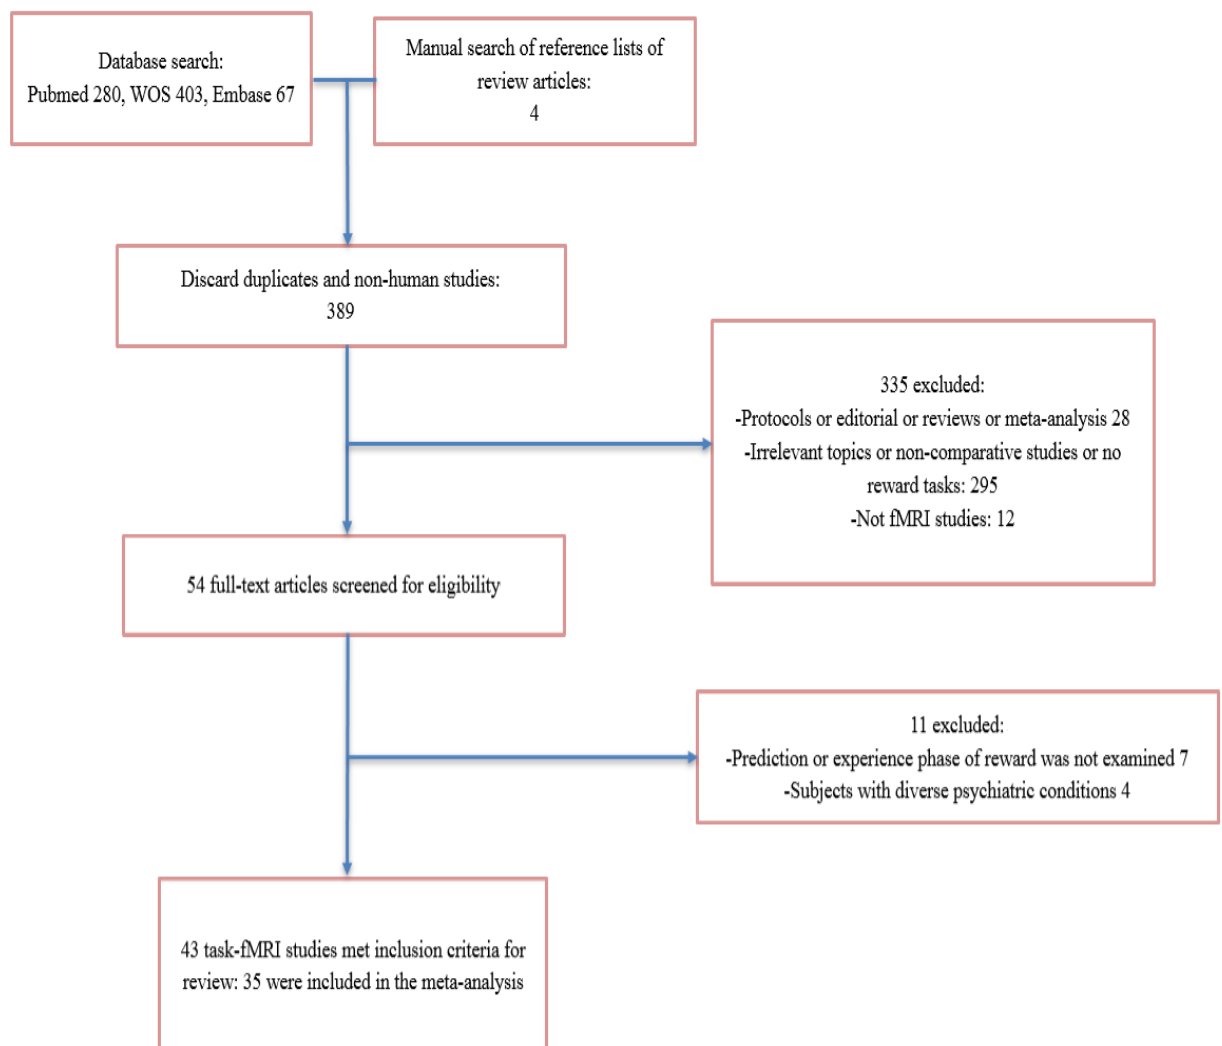

Figure S1 A flow diagram of study selection

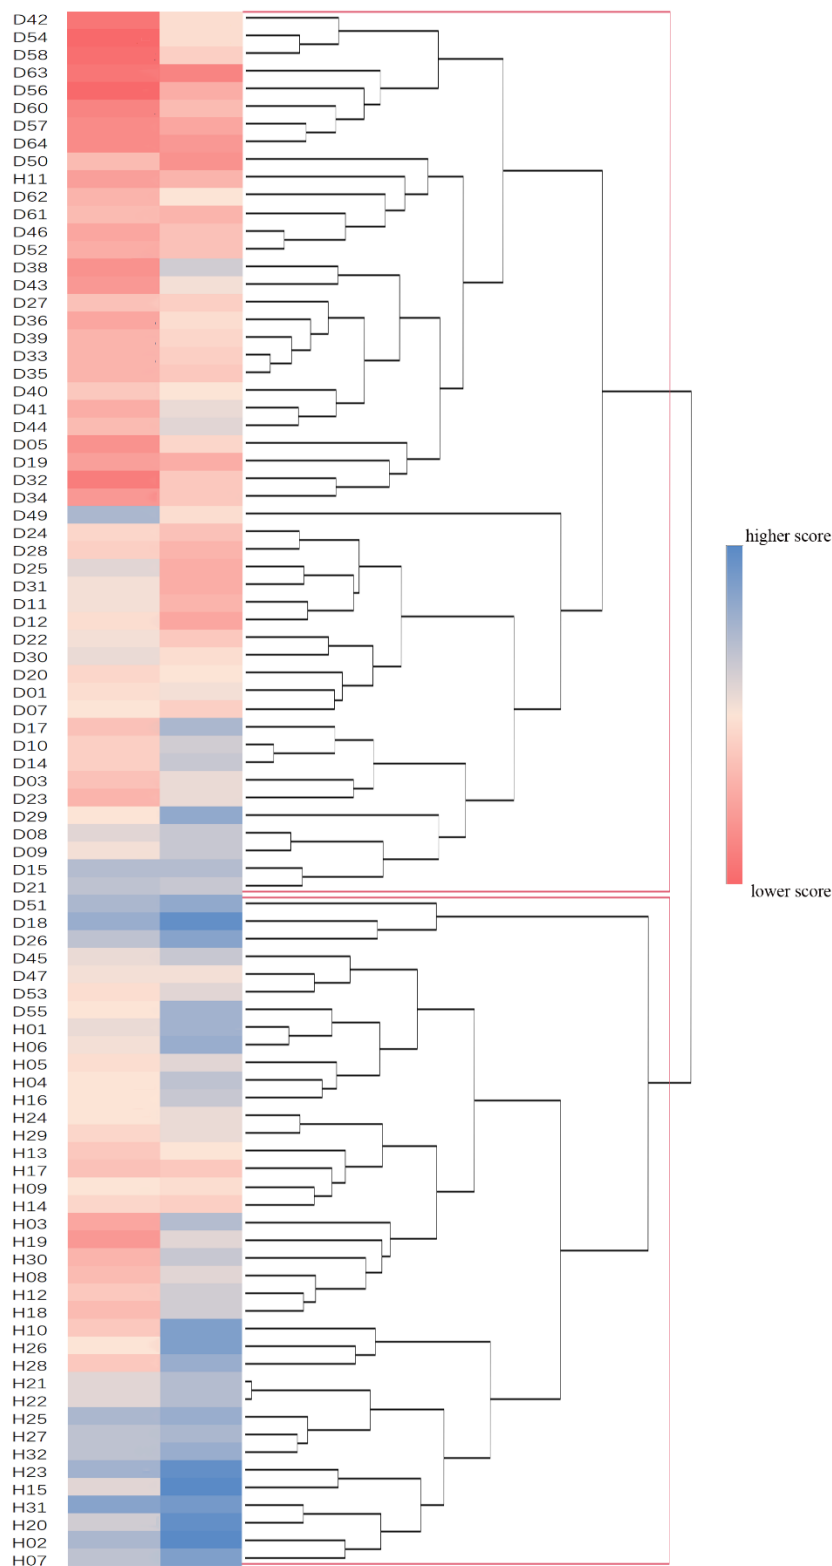

Figure S2 Classification of all participants to 2 clusters (the upper: group M, the lower: group N) based on scores of TEPS-anti and TEPS-con. The dendrogram showed the result of hierarchical clustering, and the heatmap demonstrated scores of TEPS-anti and TEPS-con of each individual. The left column indicated the ID of each individual (D is patient and H is healthy control). Abbreviations: TEPS, the Temporal Experience of Pleasure Scale (TEPS-anti, anticipatory subscale of TEPS; TEPS-con, consummatory subscale of TEPS).

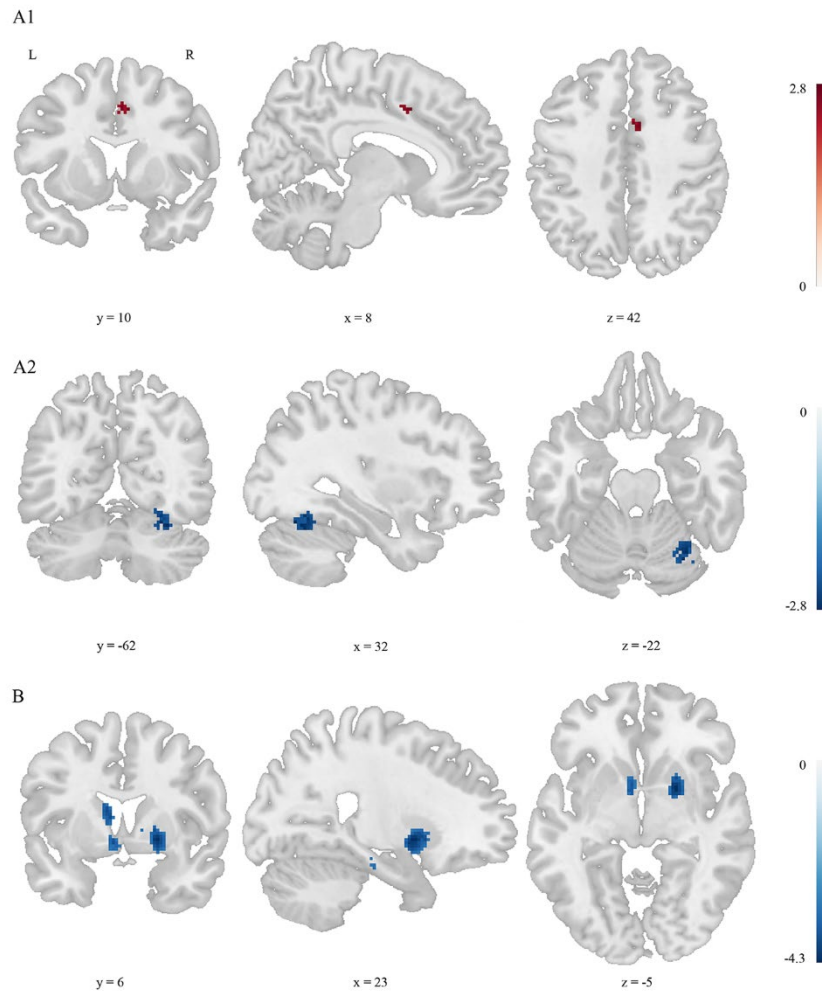

Figure S3 Differences of brain activation patterns in reward anticipation and feedback between patients with MDD and healthy controls

Image A depict brain regions in which patients with MDD exhibited greater activation (A1, right median cingulate gyrus) and lower activation (A2, cerebellum lobule VI/fusiform gyrus) than healthy controls during reward anticipation ( $p < 0.01$ , uncorrected); Image B shows brain regions in which MDD < healthy controls during reward feedback ( $p < 0.001$ , uncorrected). The colorbar indicates z scores.

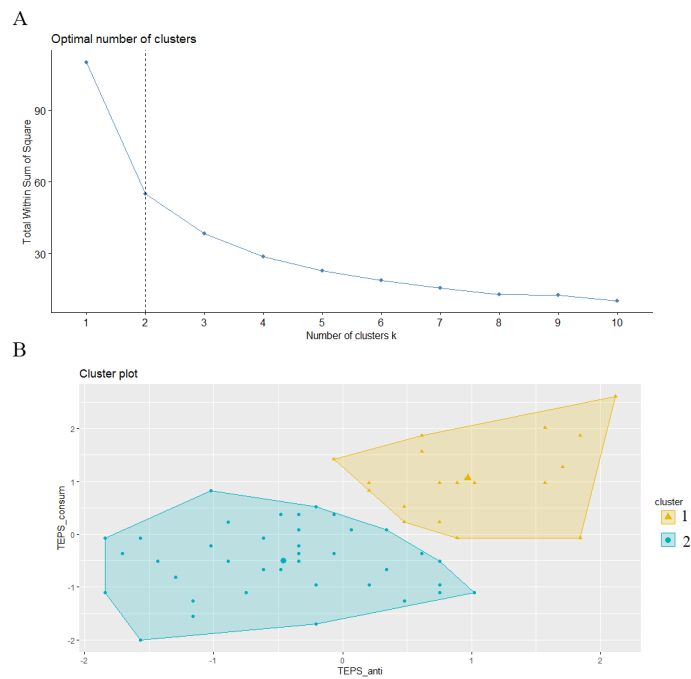

Figure S4 Elbow test for k-means analysis (A) and k-means clustering results (B) for all patients.

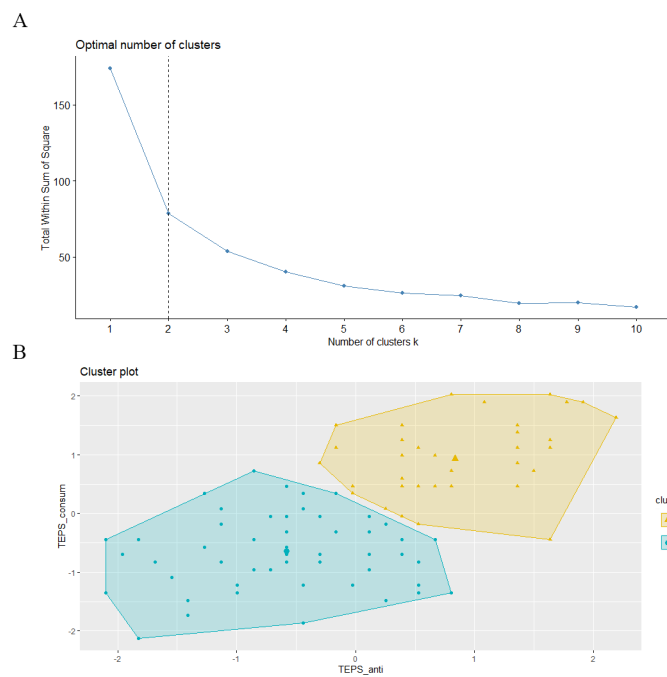

Figure S5 Elbow test for k-means analysis (A) and k-means clustering results (B) for all participants. Cluster 1 (higher TEPS scores) and Cluster 2 (lower TEPS scores) included 30 and 58 individuals, respectively. Specifically, 86% individuals in the Cluster 2 overlapped with those in the hierarchical clustering group M, and 61% individuals in the Cluster 1 were in the hierarchical clustering group N.
